# Supplementary material for: Design and Synthesis of Immunoadjuvant QS-21 Analogs and Their Biological Evaluation
Source: MDPI journal article supplement (doi:10.3390/biomedicines12020469), 2024-02-19
Supplement: s1 [file s1]

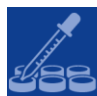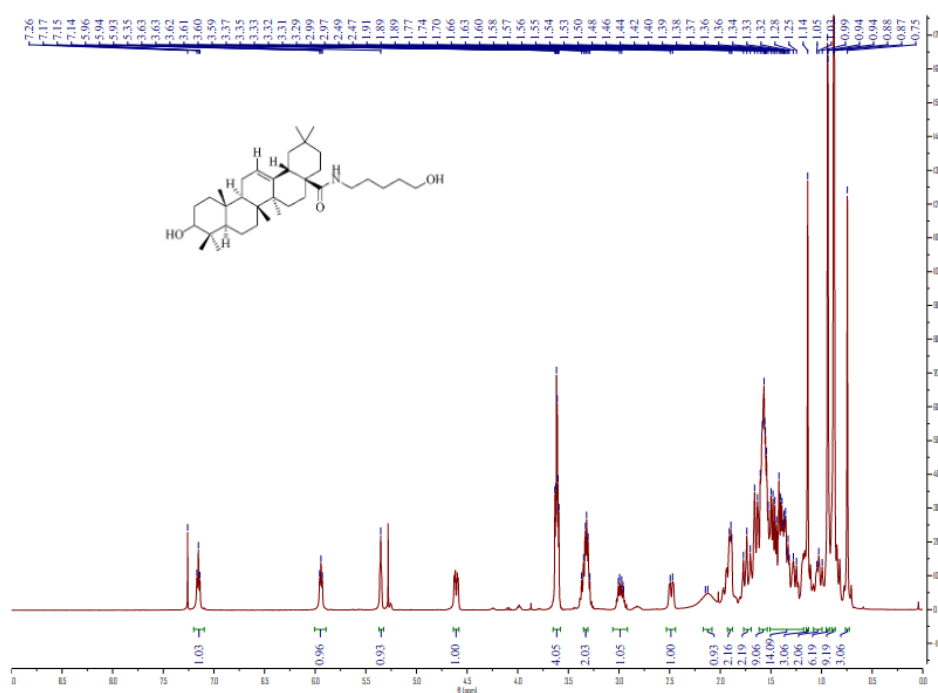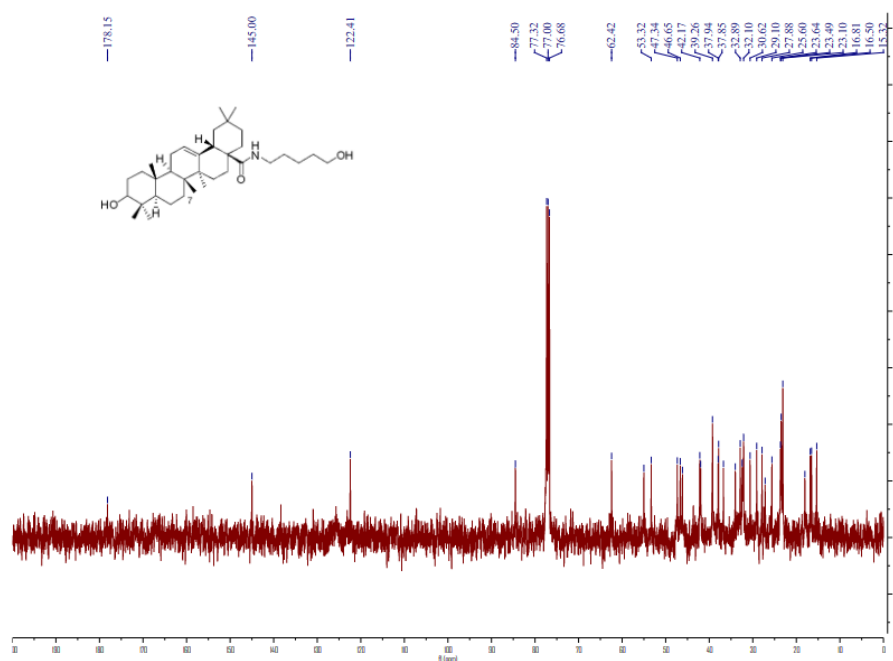

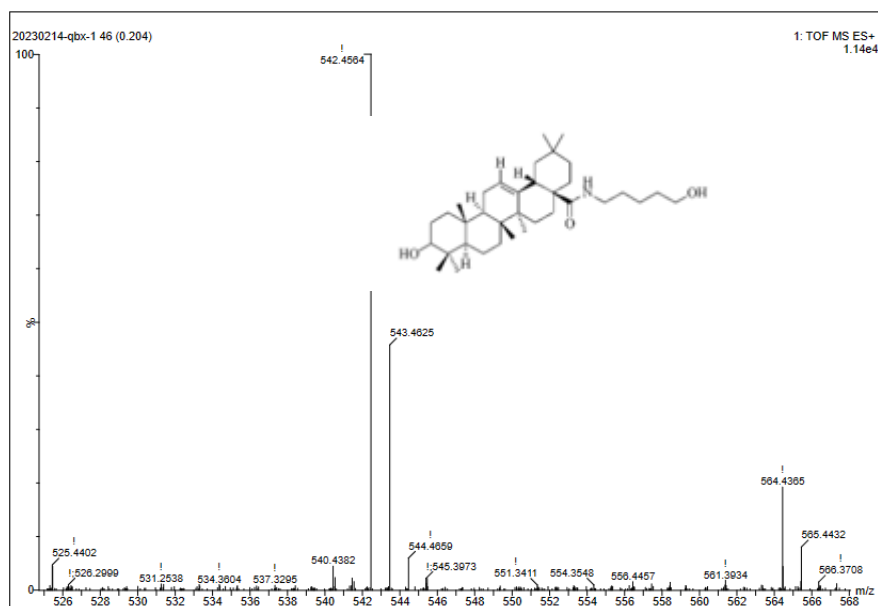Figure S3. HRMS of L1 ( ESI<sup>+</sup> )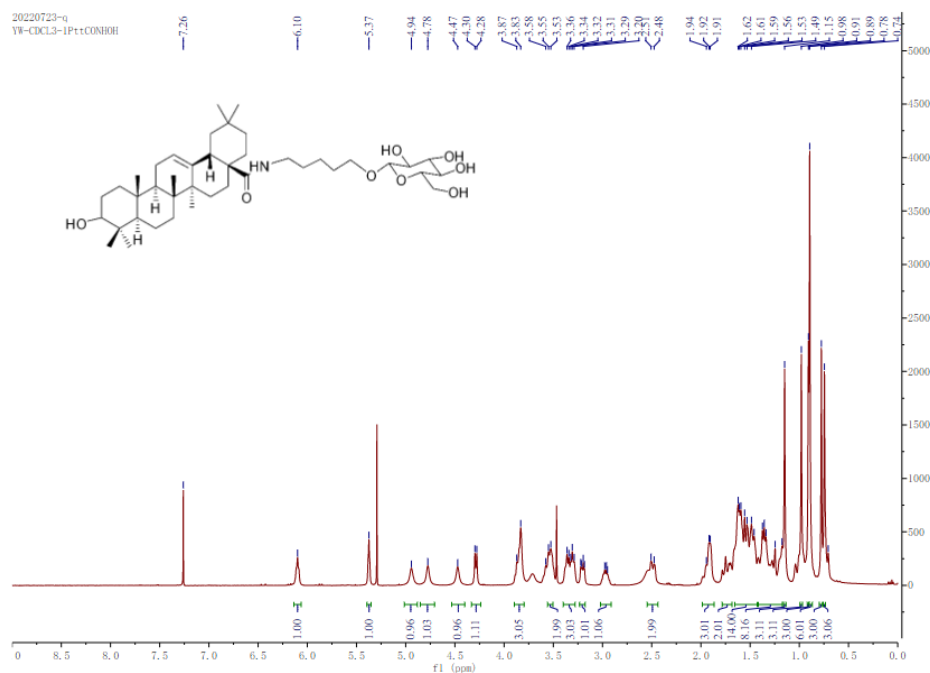Figure S4. <sup>1</sup>H NMR of L2

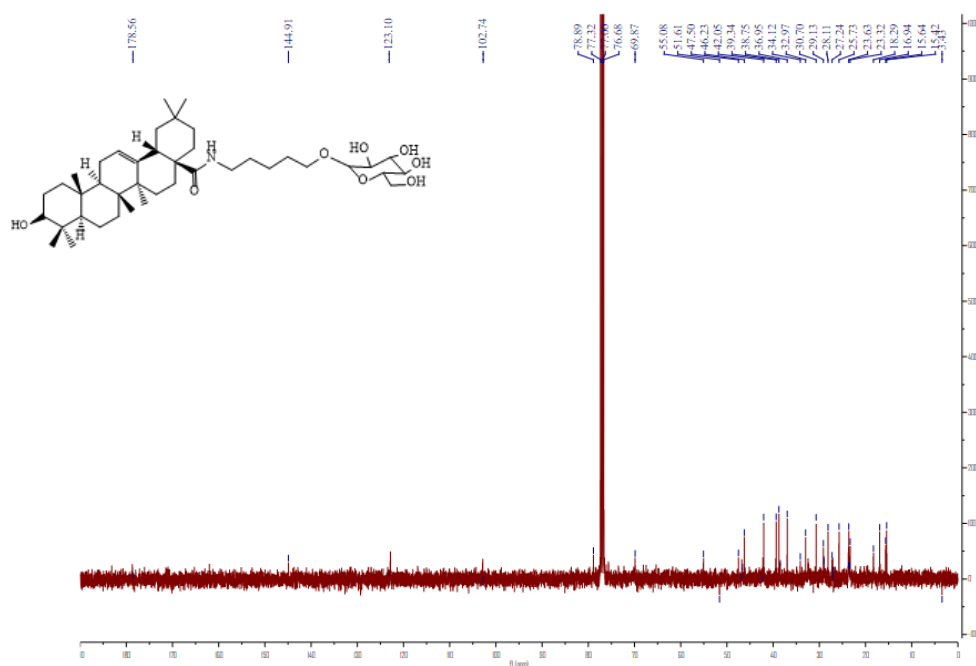Figure S5. <sup>13</sup>C NMR of L2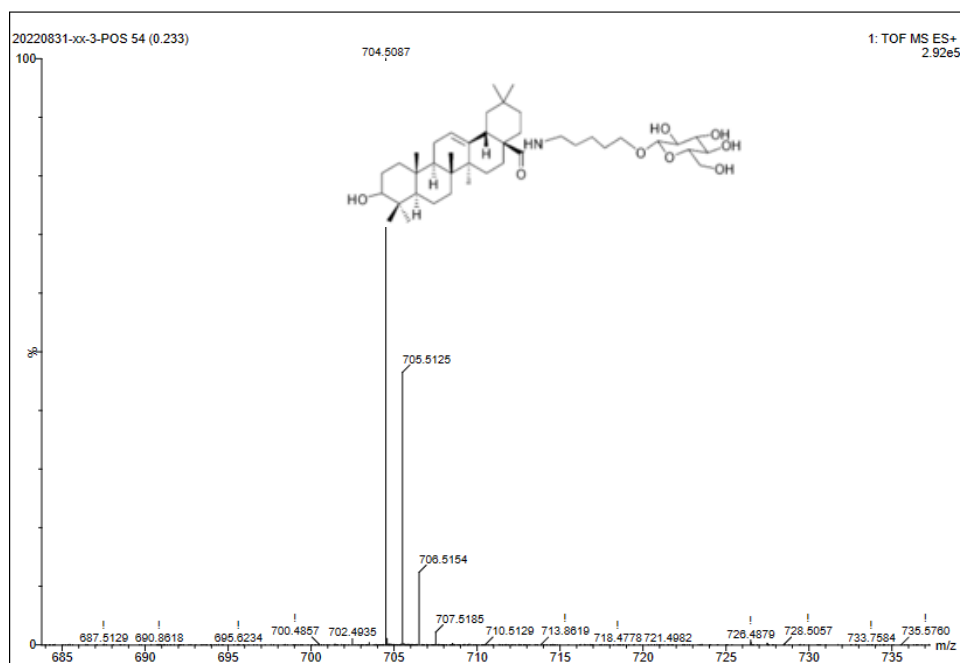Figure S6. HRMS of L2 ( ESI<sup>+</sup> )

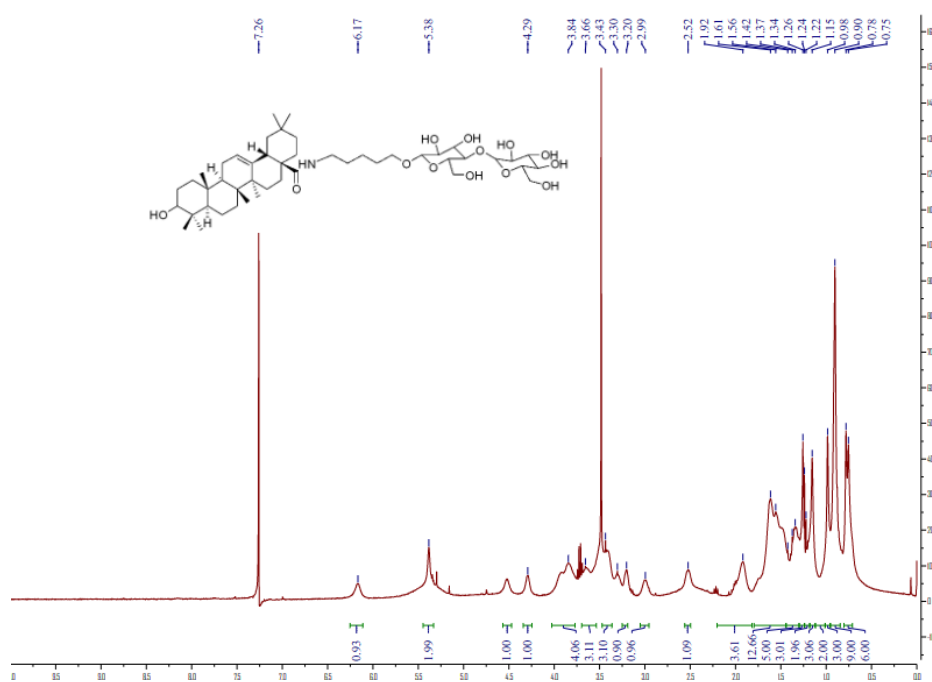Figure S7. <sup>1</sup>H NMR of L3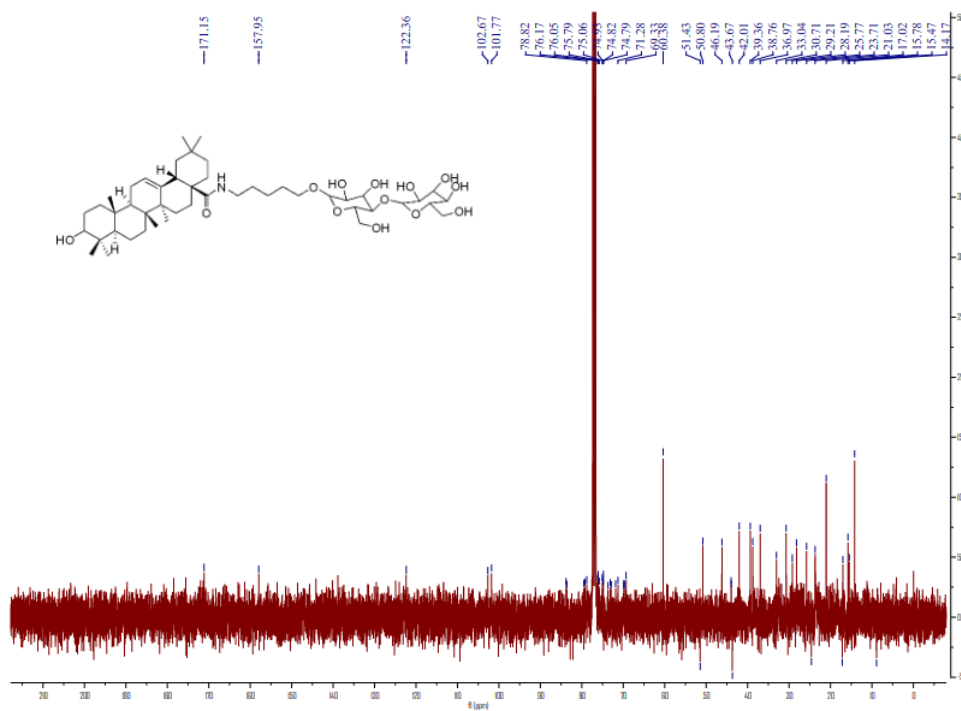Figure S8. <sup>13</sup>C NMR of L3

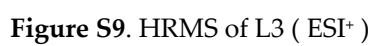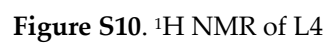

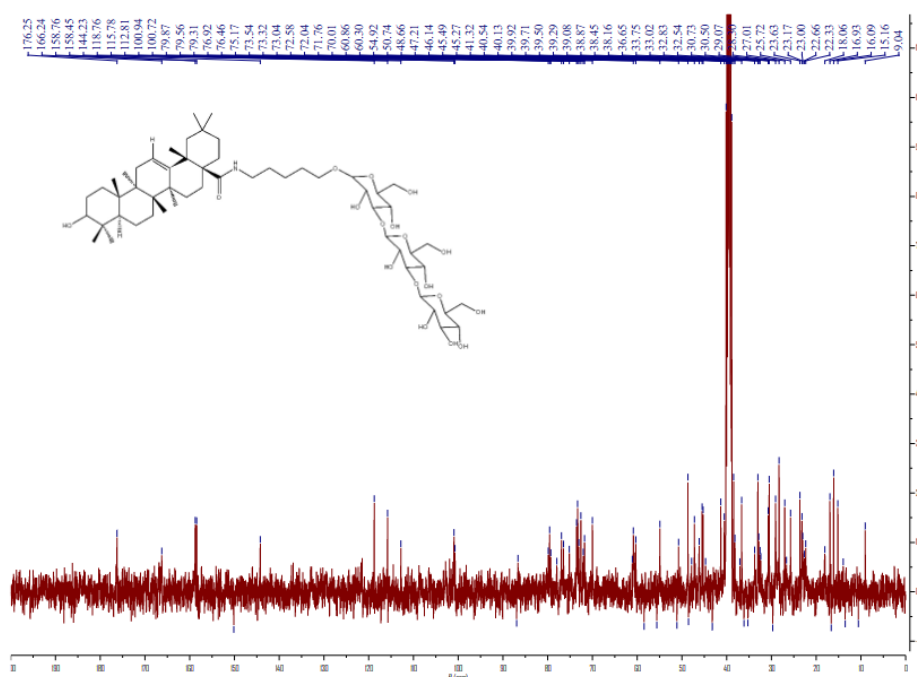Figure S11.  $^{13}\text{C}$  NMR of L4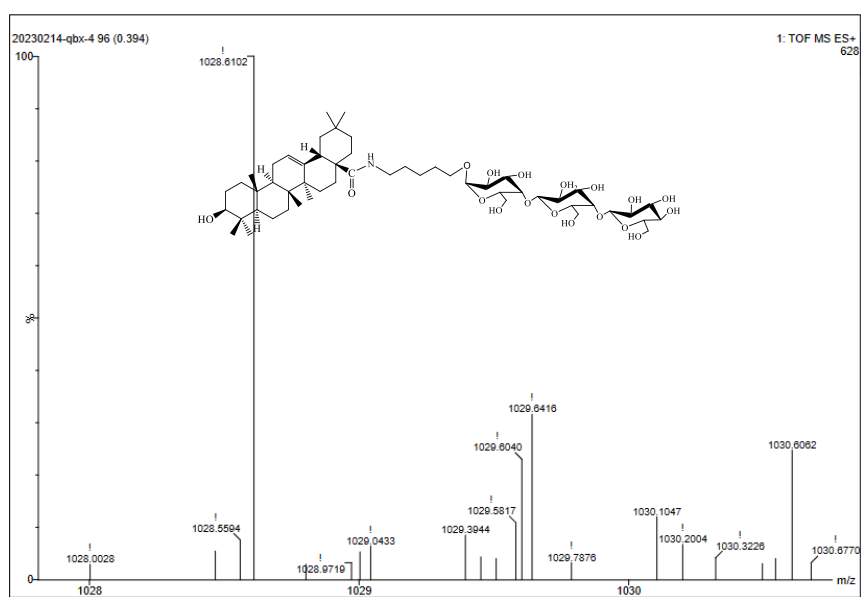Figure S12. HRMS of L4 (ESI<sup>+</sup>)

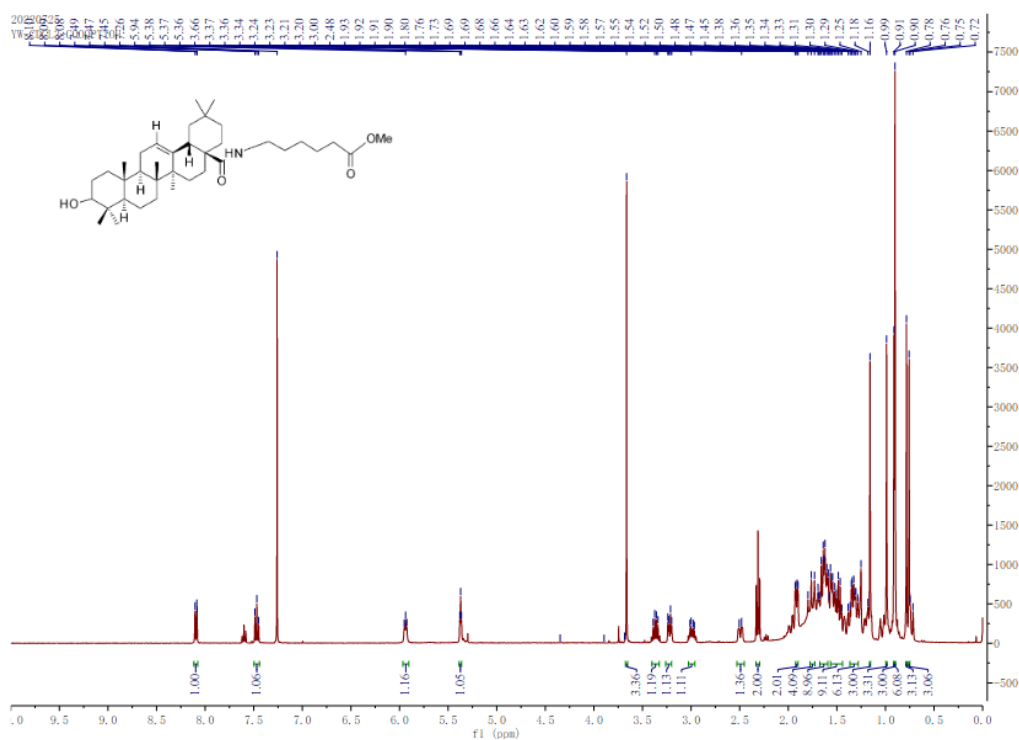Figure S13. <sup>1</sup>H NMR of L5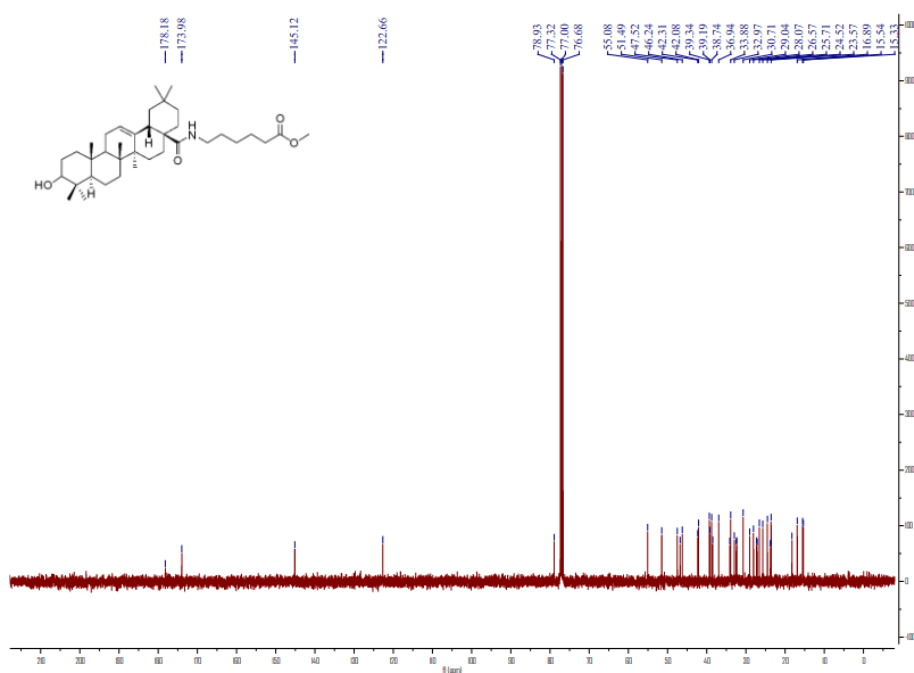Figure S14. <sup>13</sup>C NMR of L5

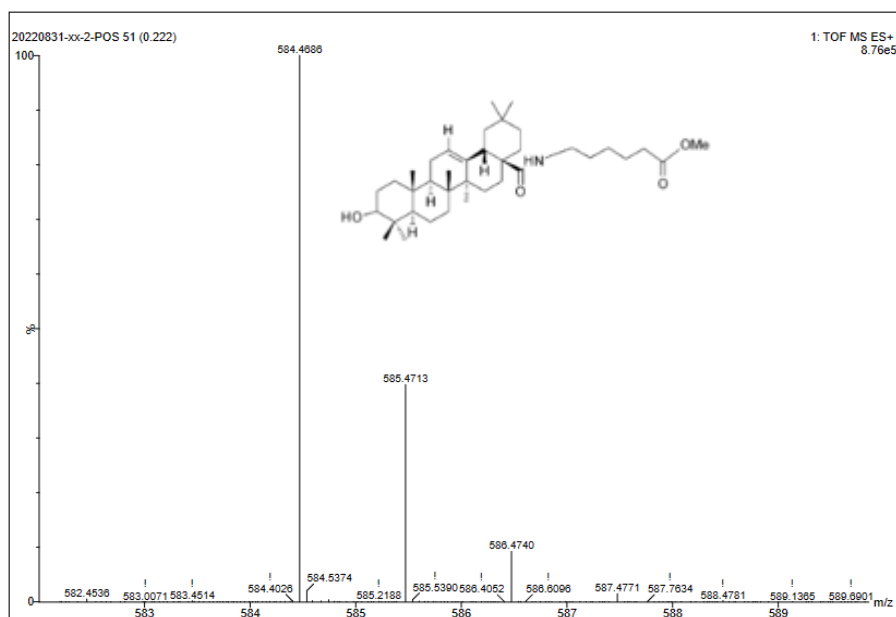Figure S15. HRMS of L5 (ESI<sup>+</sup>)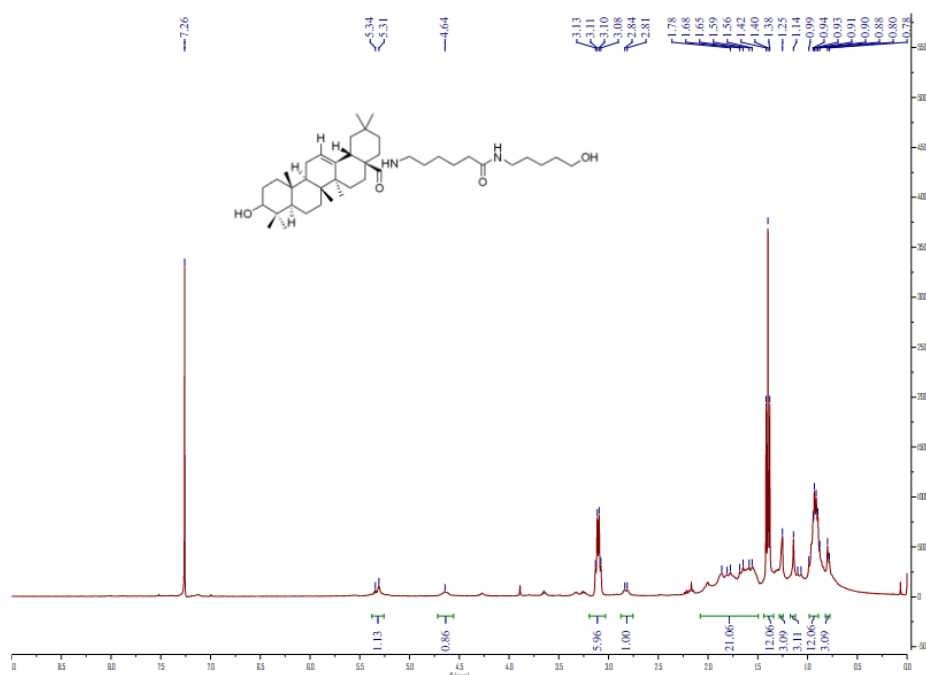Figure S16. <sup>1</sup>H NMR of L6



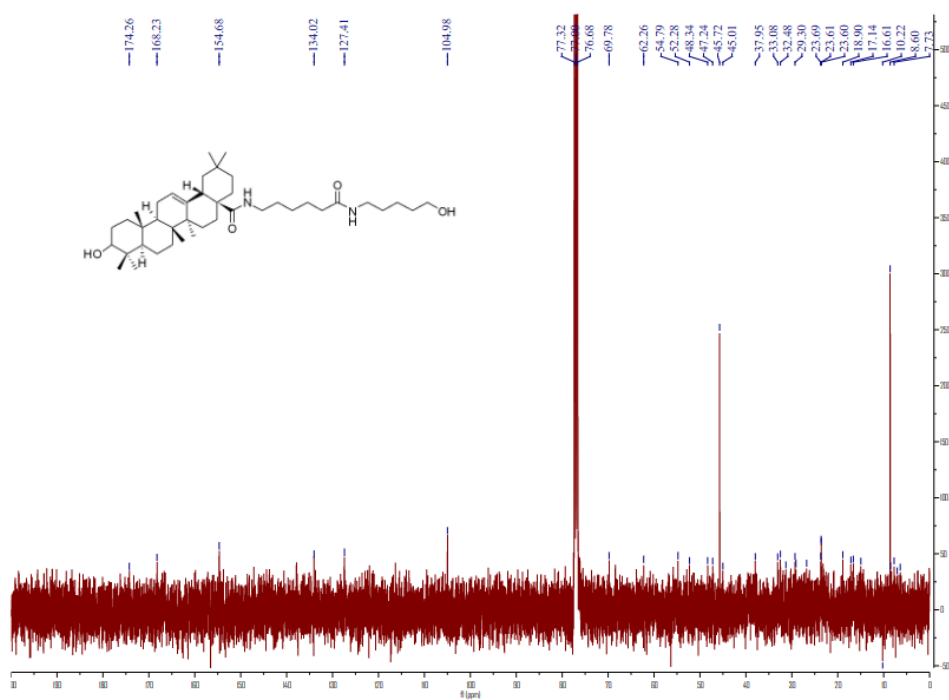Figure S17. <sup>13</sup>C NMR of L6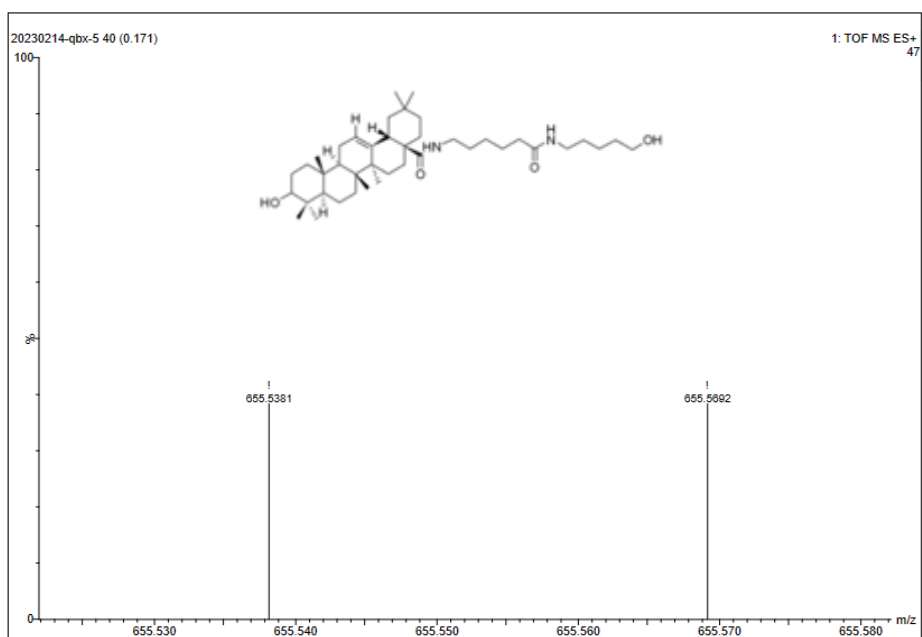Figure S18. HRMS of L6 (ESI<sup>+</sup>)

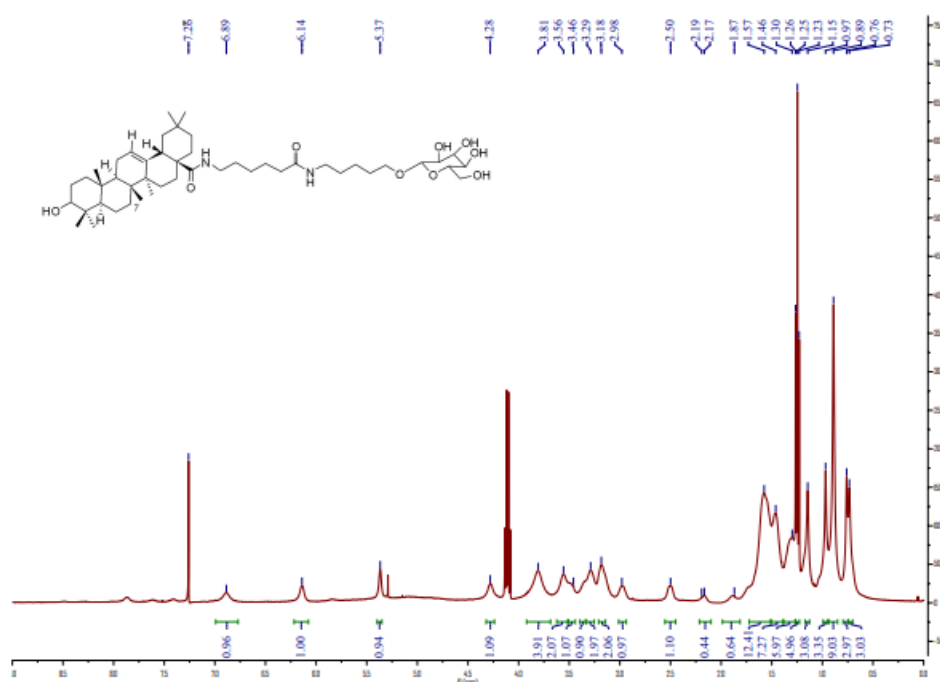Figure S19. <sup>1</sup>H NMR of L7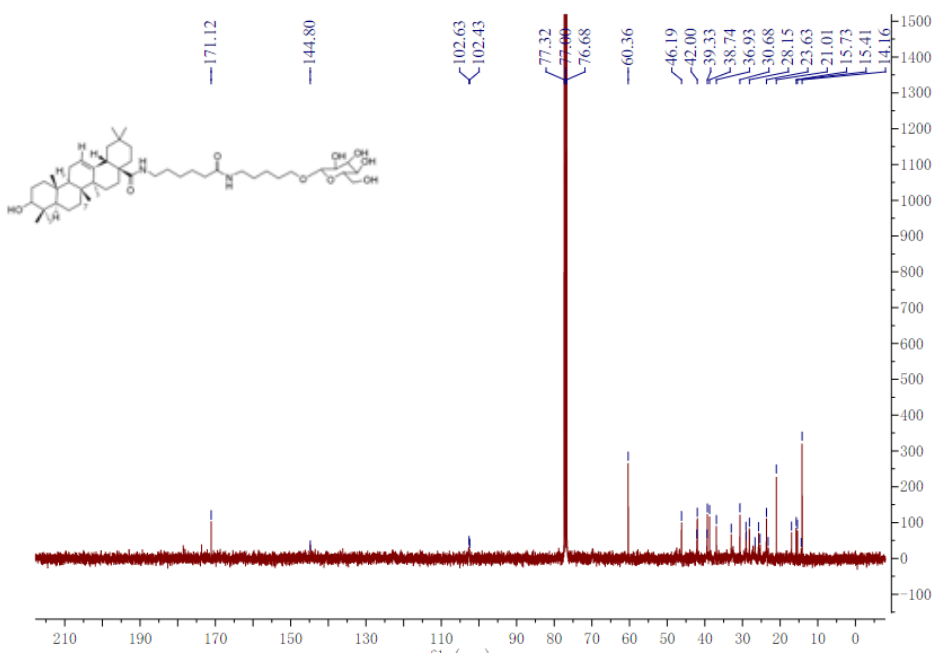Figure S20. <sup>13</sup>C NMR of L7

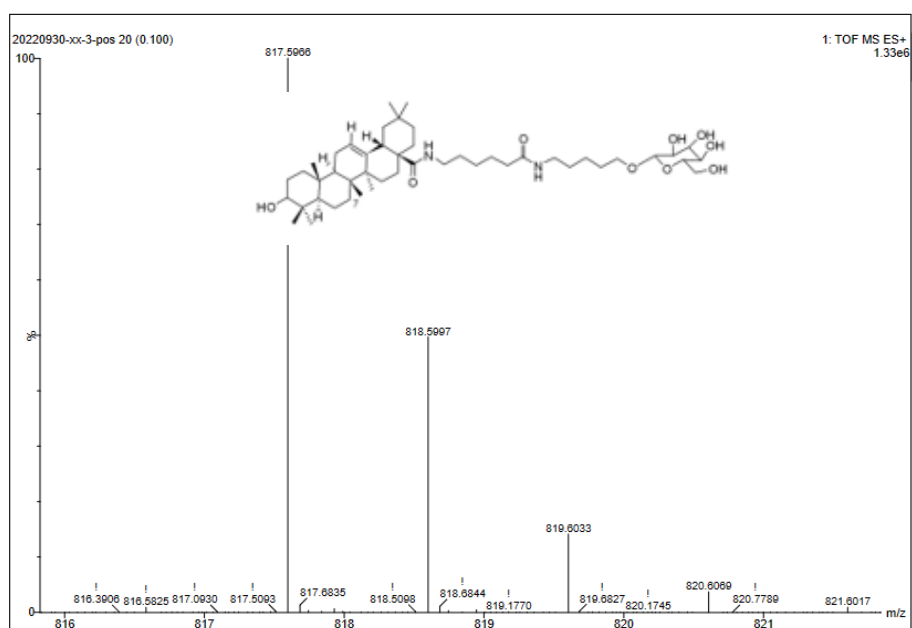Figure S21. HRMS of L7 ( ESI<sup>+</sup> )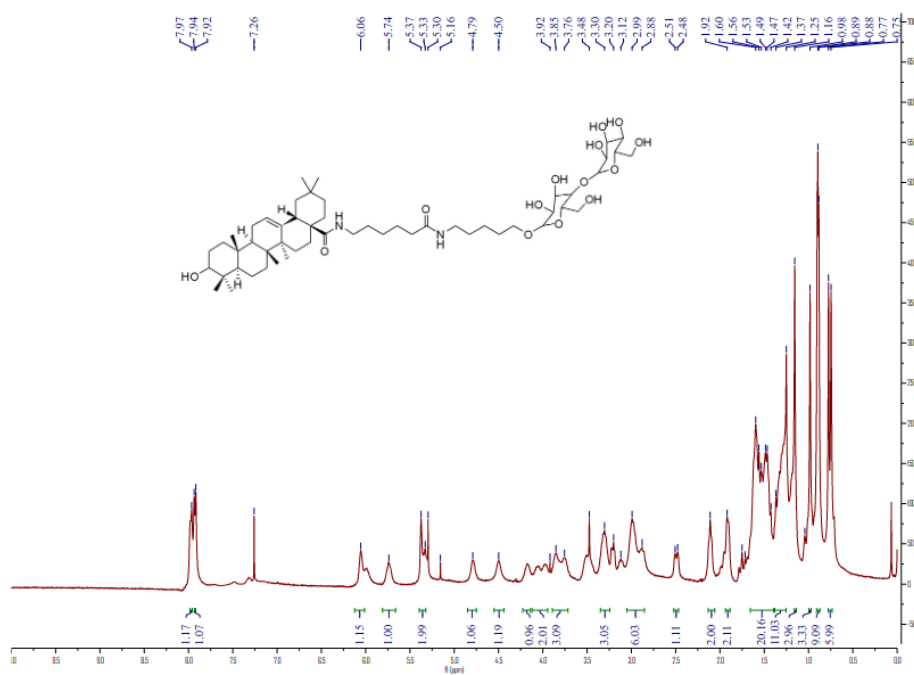Figure S22. <sup>1</sup>H NMR of L8

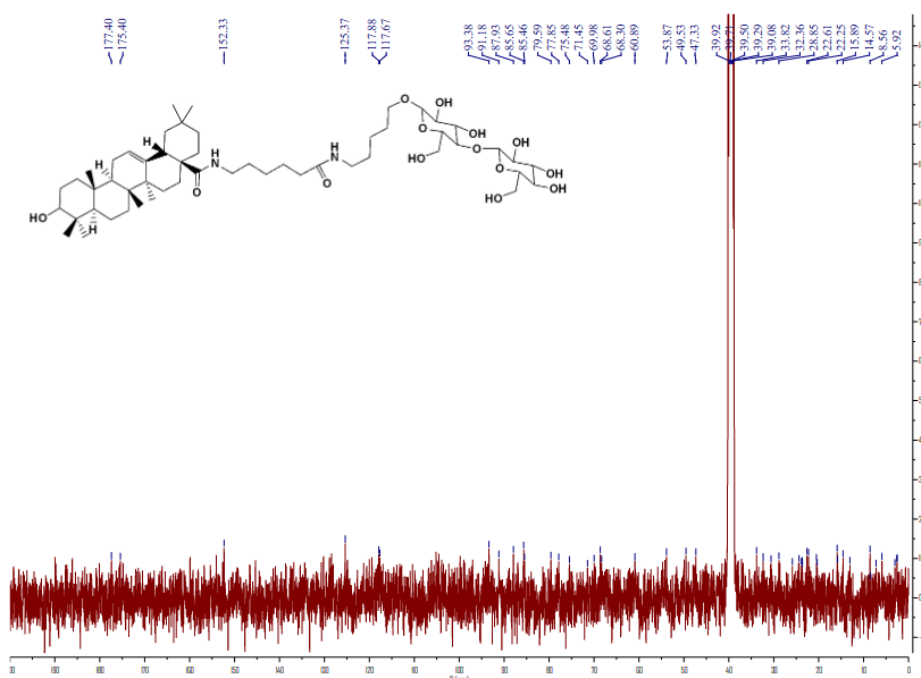Figure S23.  $^{13}\text{C}$  NMR of L8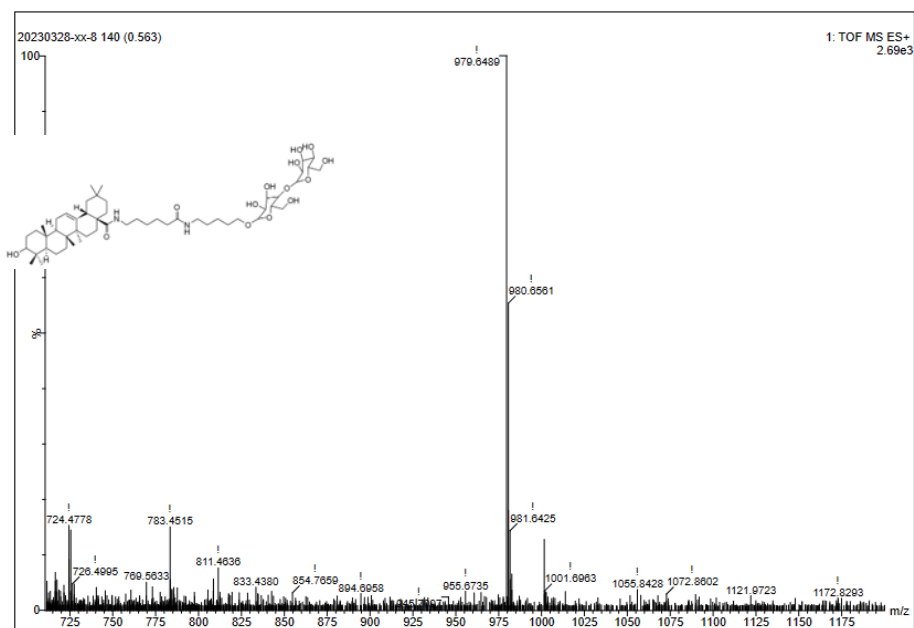Figure S24. HRMS of L8 (ESI<sup>+</sup>)

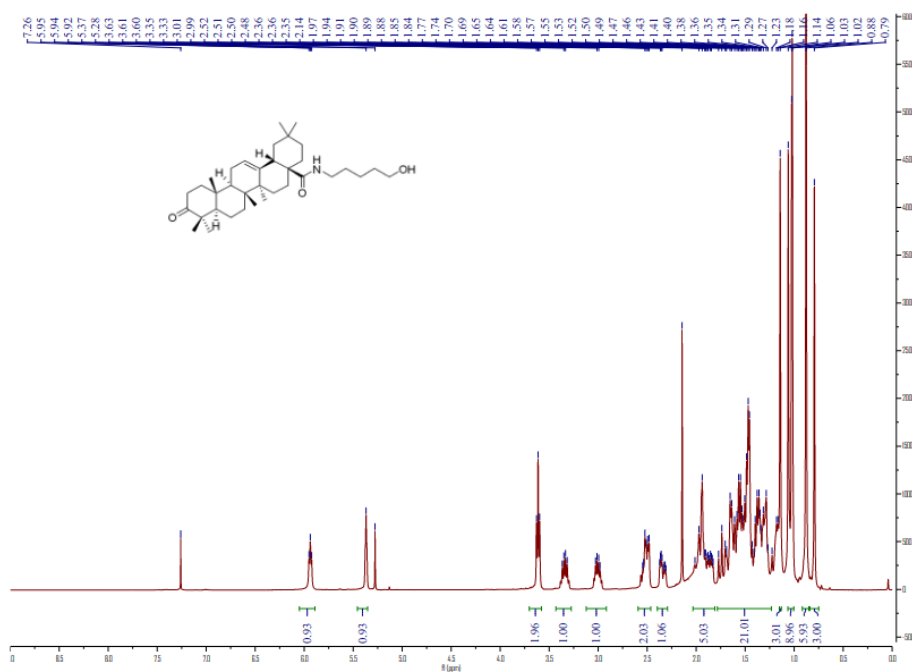Figure S25. <sup>1</sup>H NMR of L9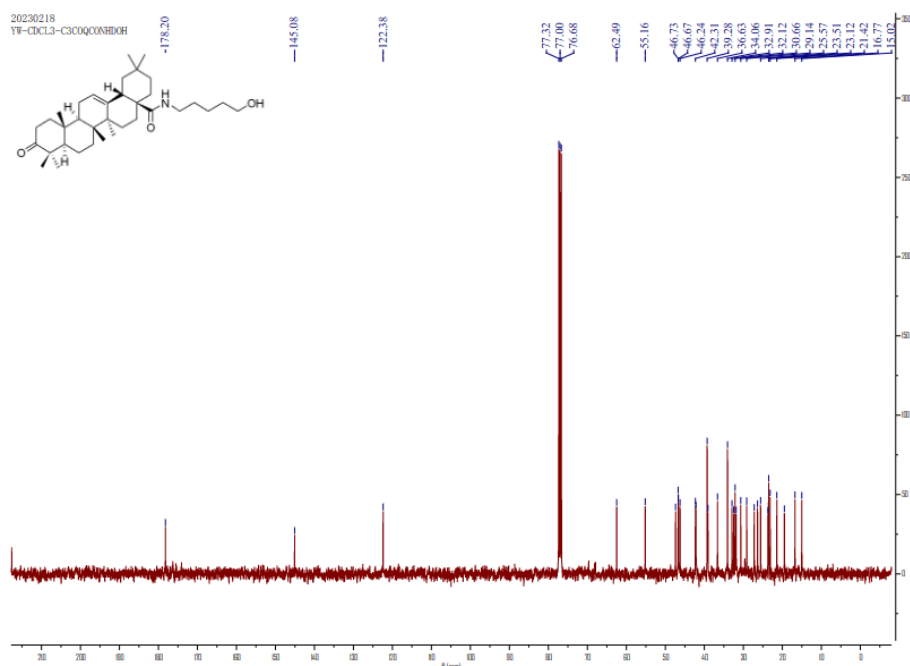Figure S26. <sup>13</sup>C NMR of L9

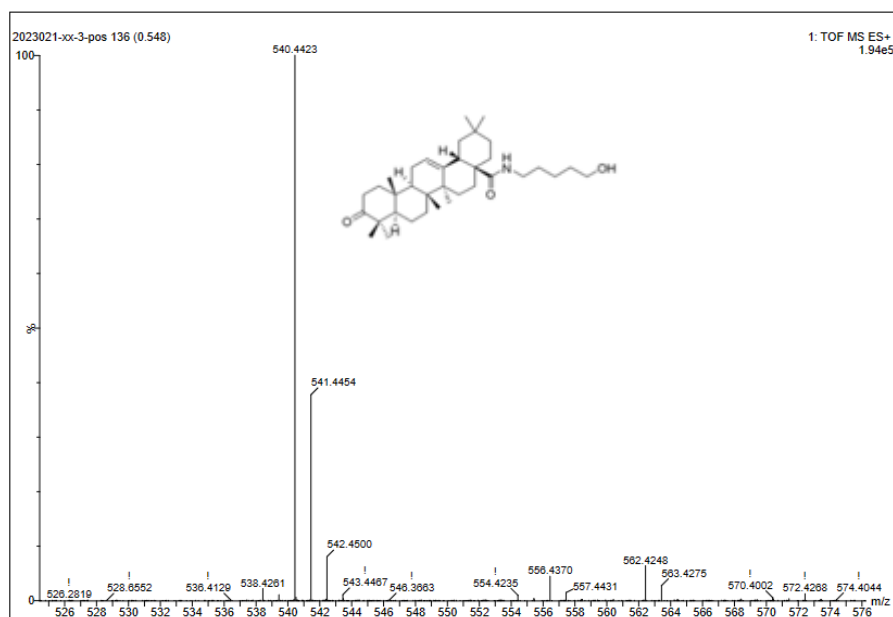Figure S27. HRMS of L9 ( ESI<sup>+</sup> )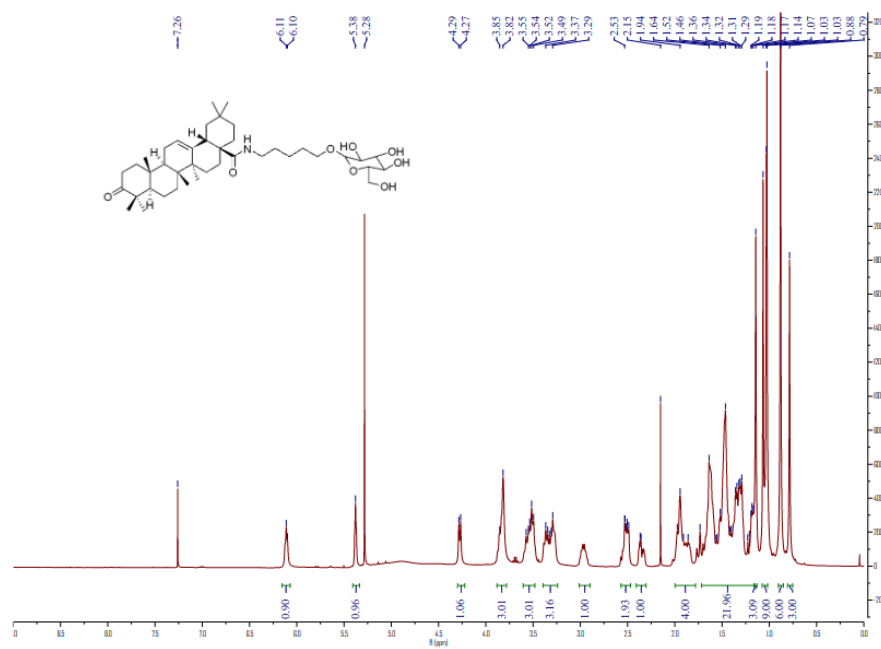Figure S28. <sup>1</sup>H NMR of L10

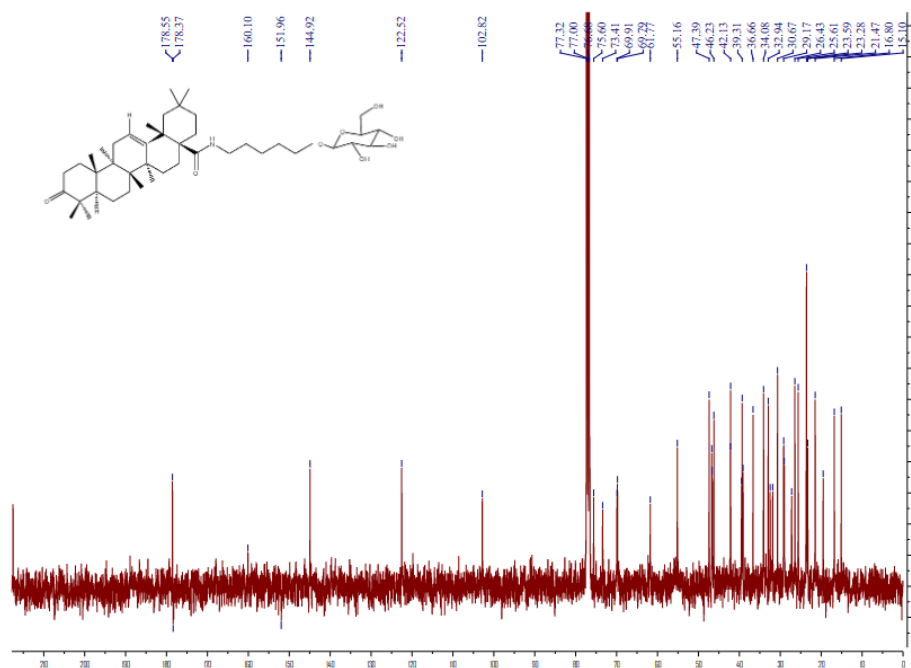Figure S29. <sup>13</sup>C NMR of L10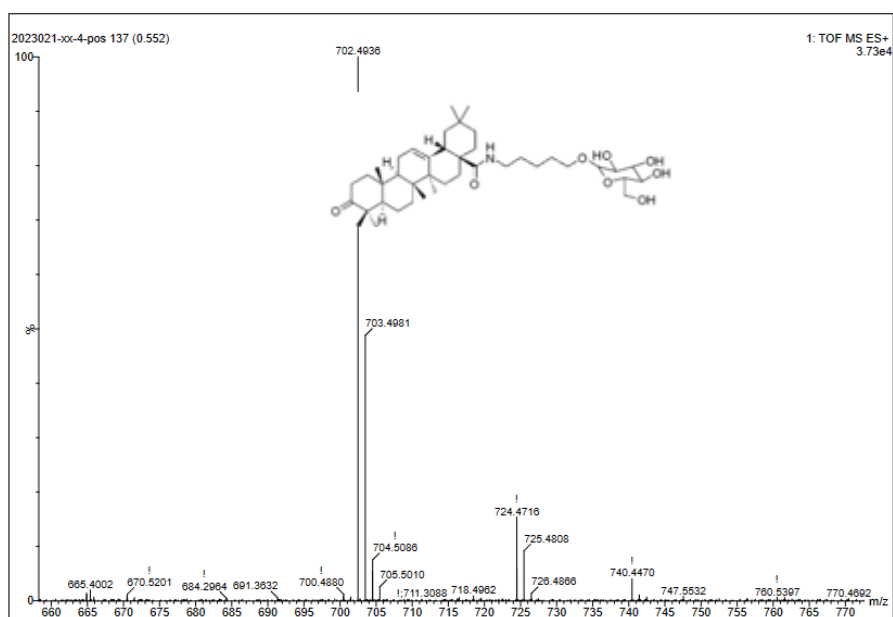Figure S30. HRMS of L10 (ESI<sup>+</sup>)

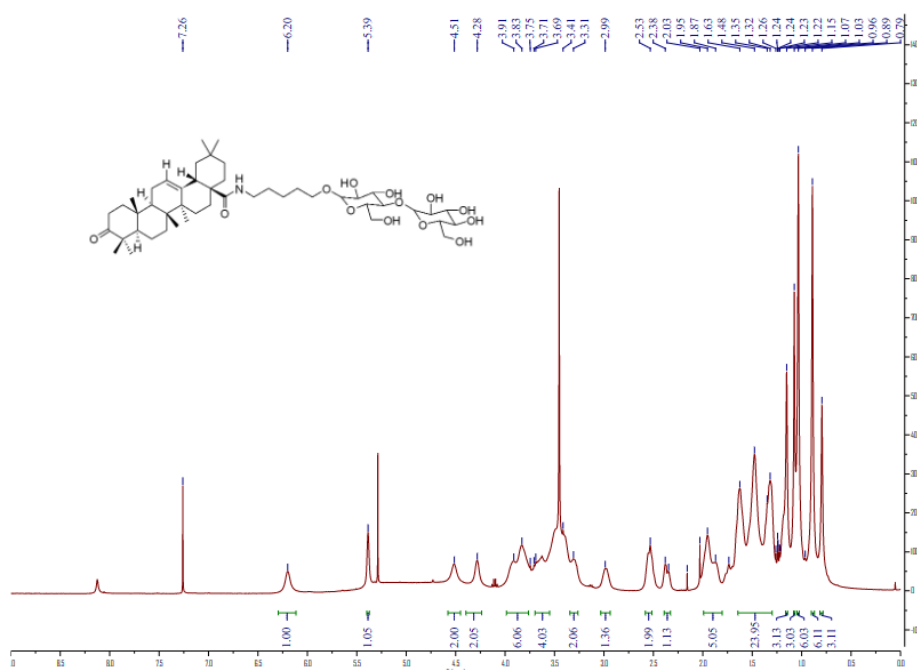Figure S31. <sup>1</sup>H NMR of L11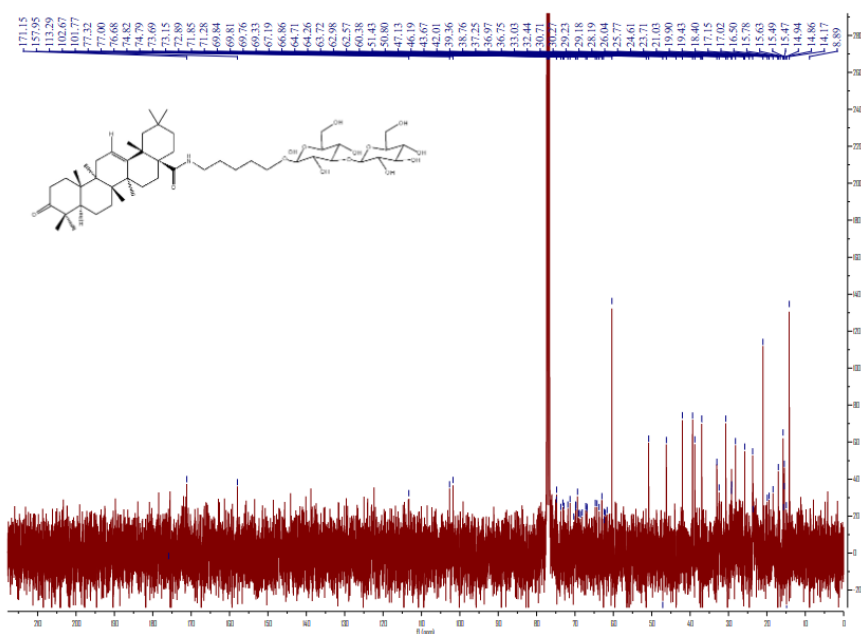Figure S32. <sup>1</sup>H NMR of L11



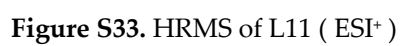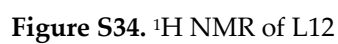

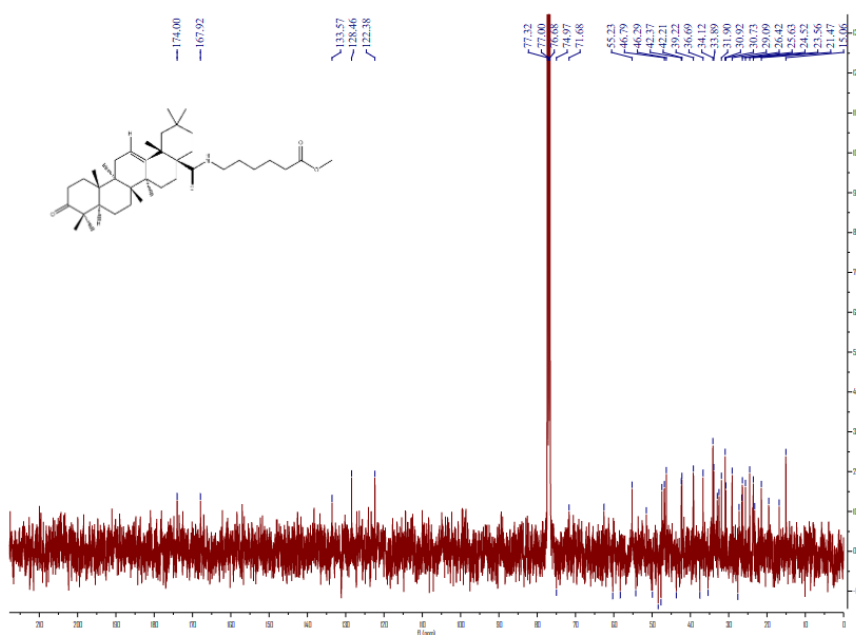Figure S35.  $^{13}\text{C}$  NMR of L12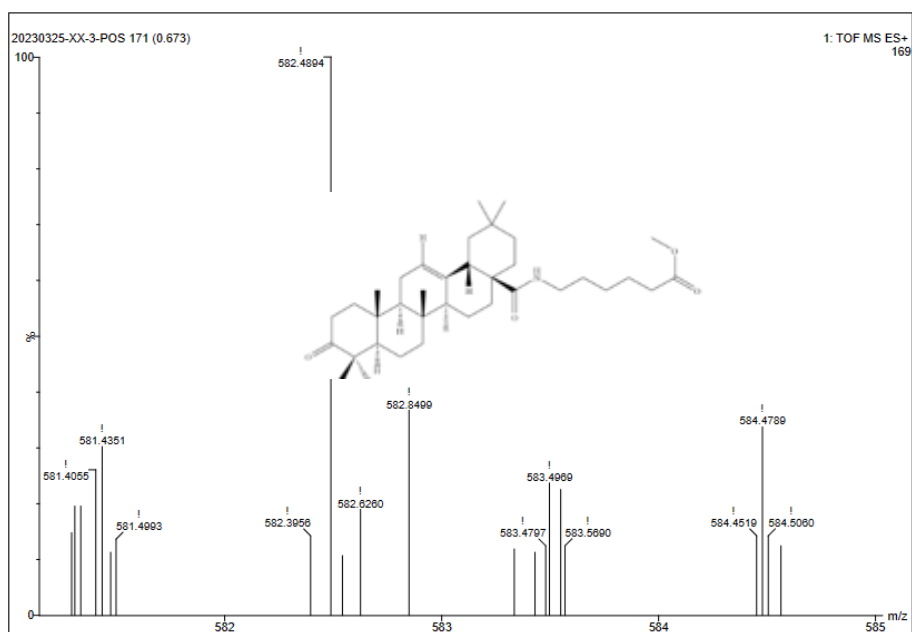Figure S36. HRMS of L12 (ESI<sup>+</sup>)

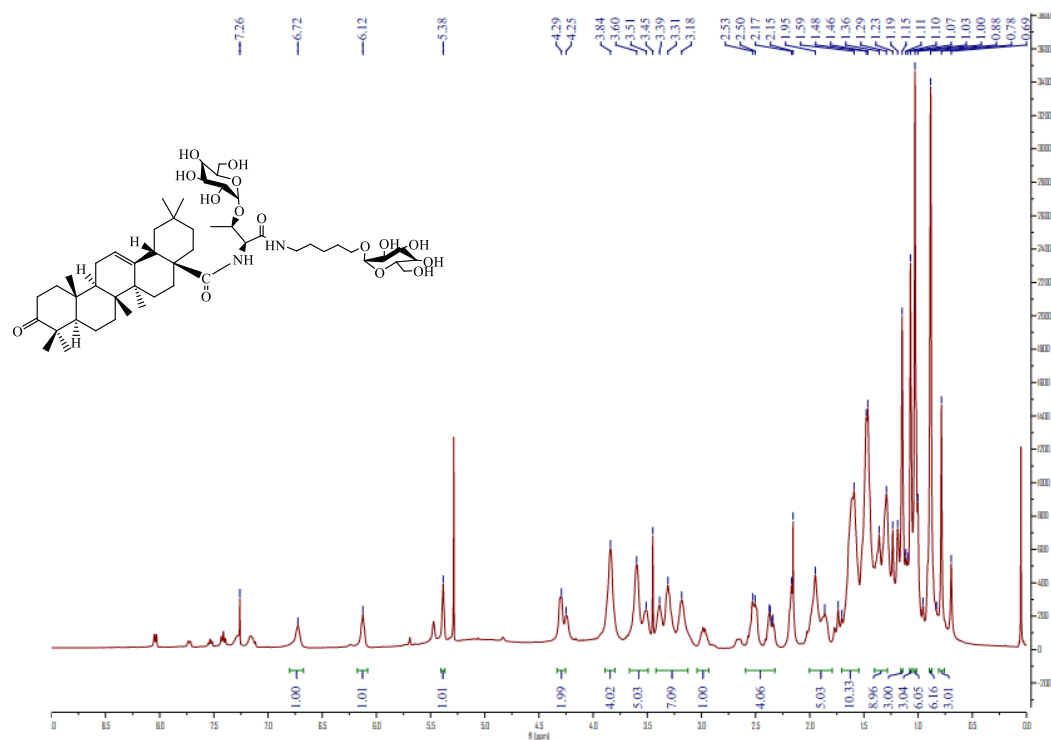Figure S37. <sup>1</sup>H NMR of L13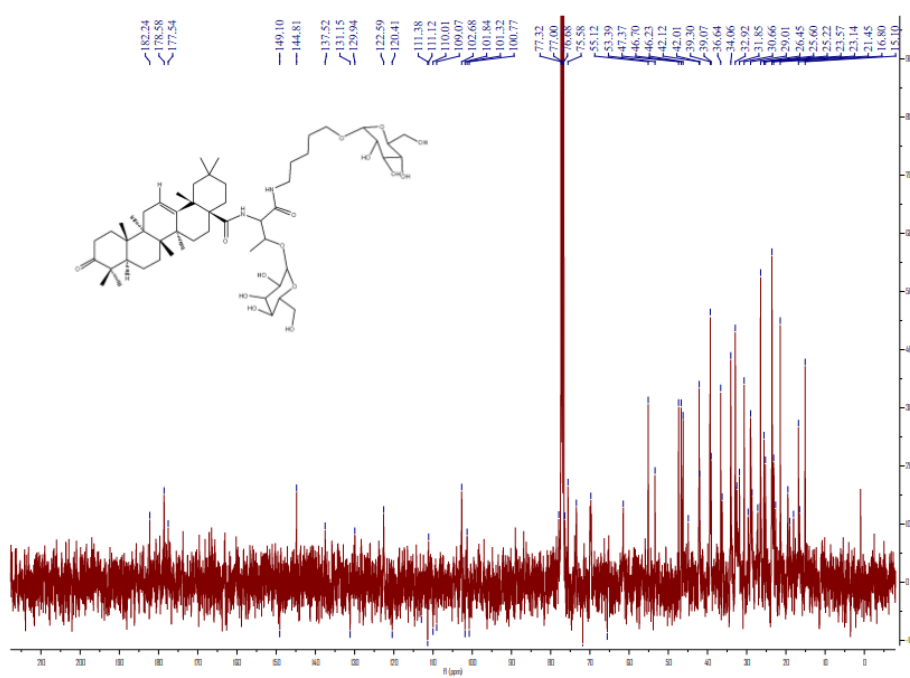Figure S38. <sup>13</sup>C NMR of L13

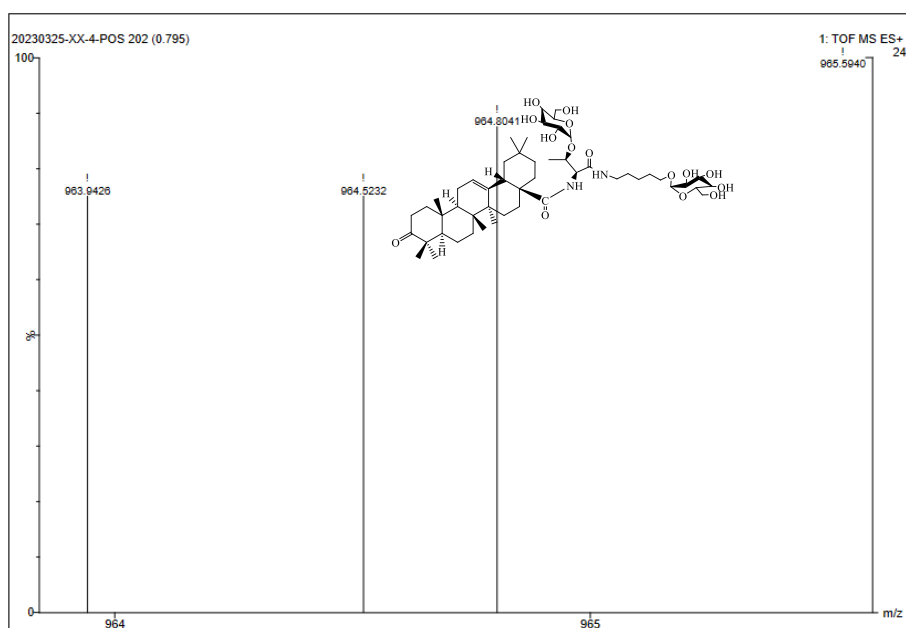Figure S39. HRMS of L13 ( ESI<sup>+</sup> )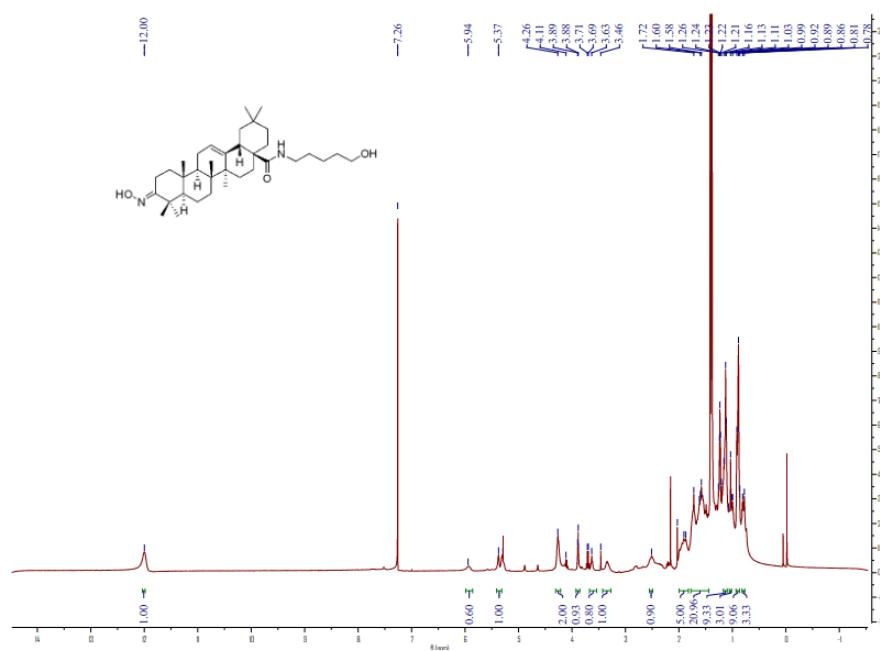Figure S40. <sup>1</sup>H NMR of L14

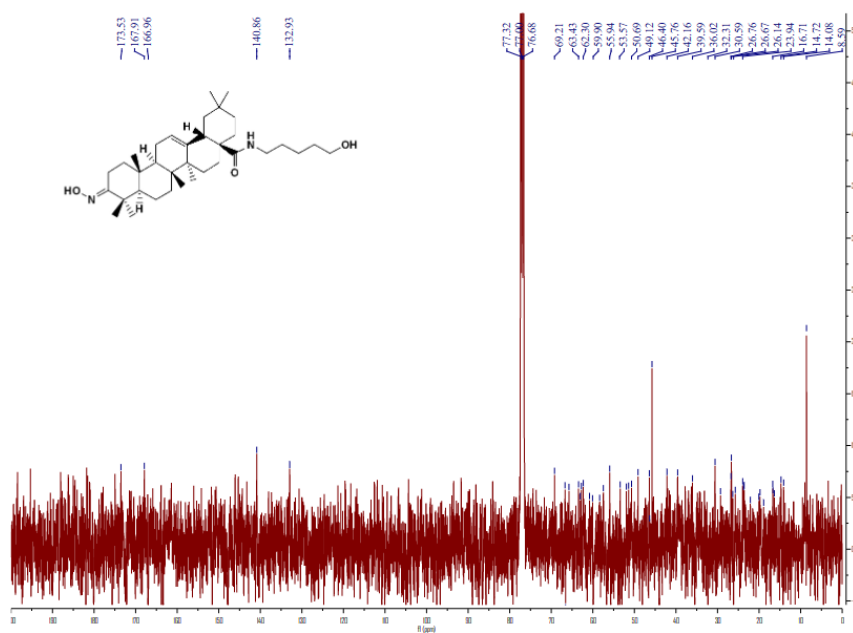Figure S41.  $^{13}\text{C}$  NMR of L14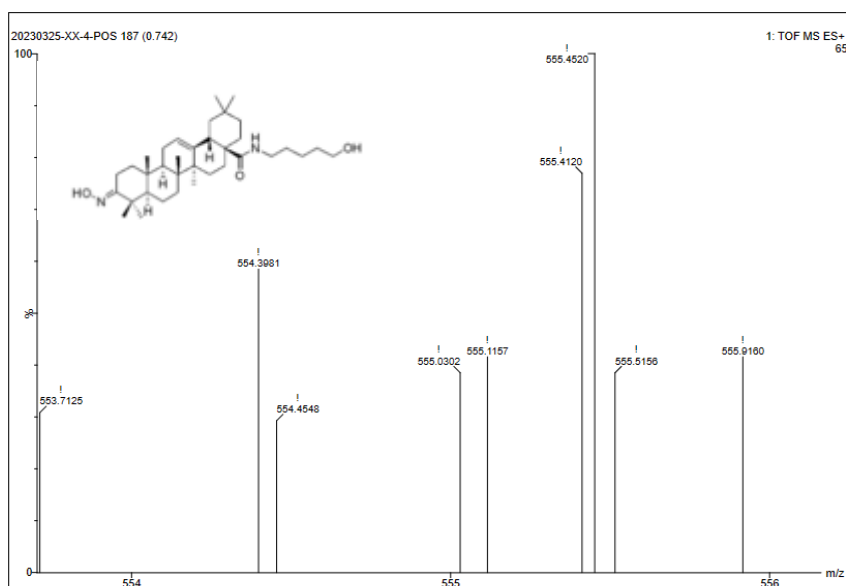Figure S42. HRMS of L14 (ESI<sup>+</sup>)

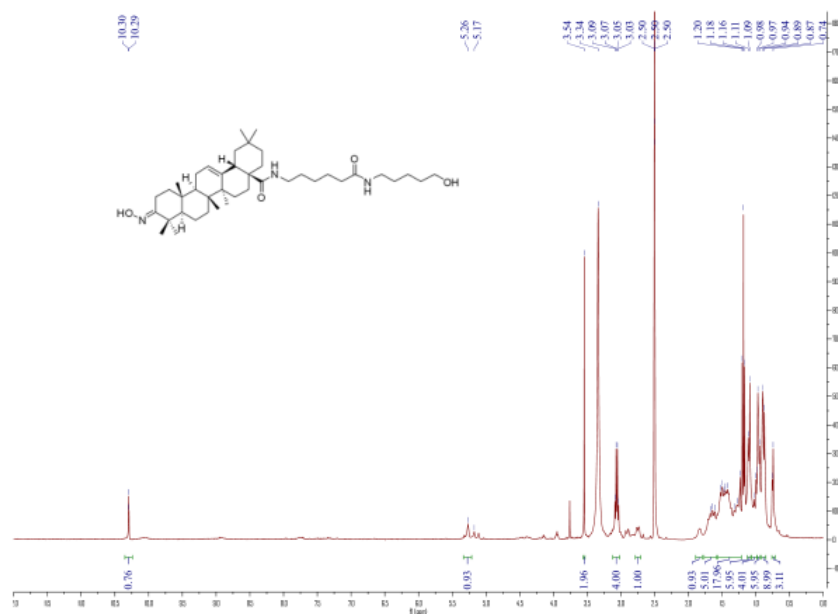Figure S43.  $^1\text{H}$  NMR of L15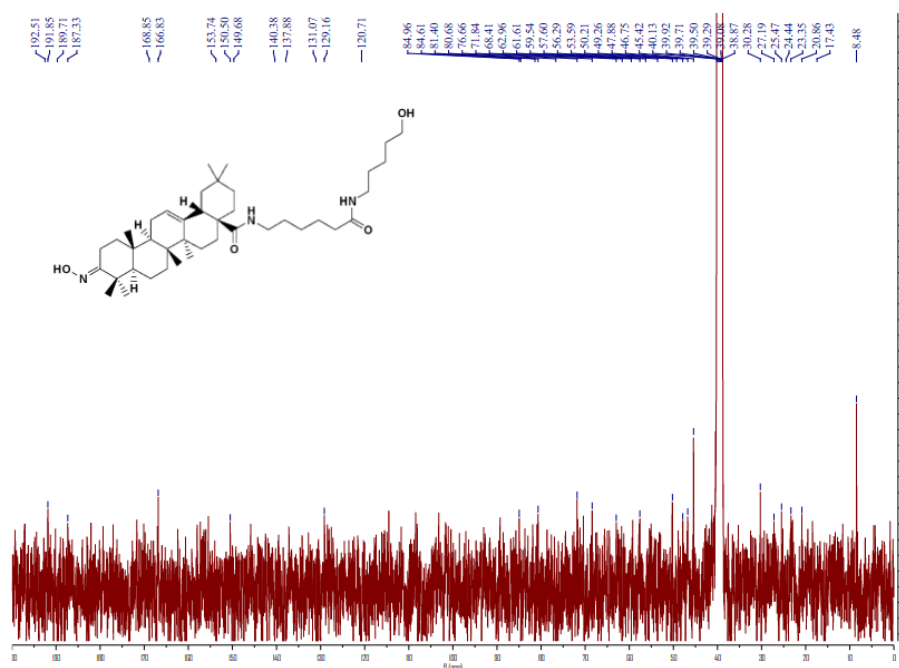Figure S44.  $^{13}\text{C}$  NMR of L15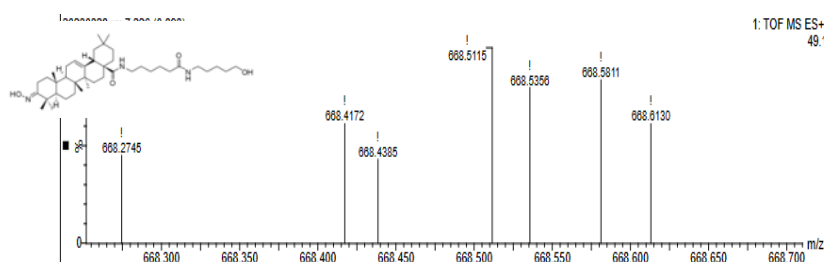Figure S45. HRMS of L15 (ESI $^{+}$ )

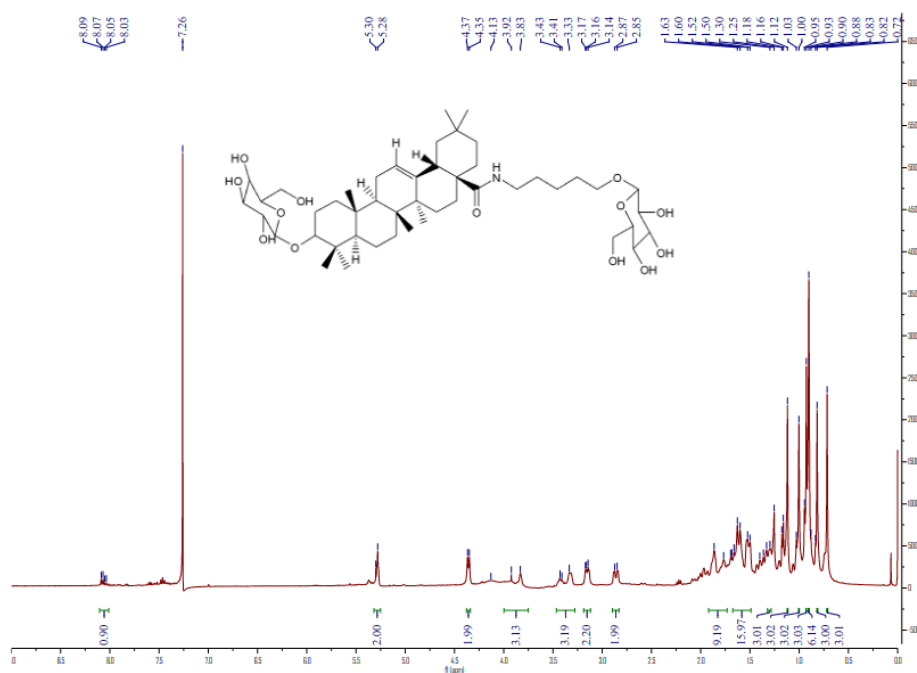Figure S46. <sup>1</sup>H NMR of L16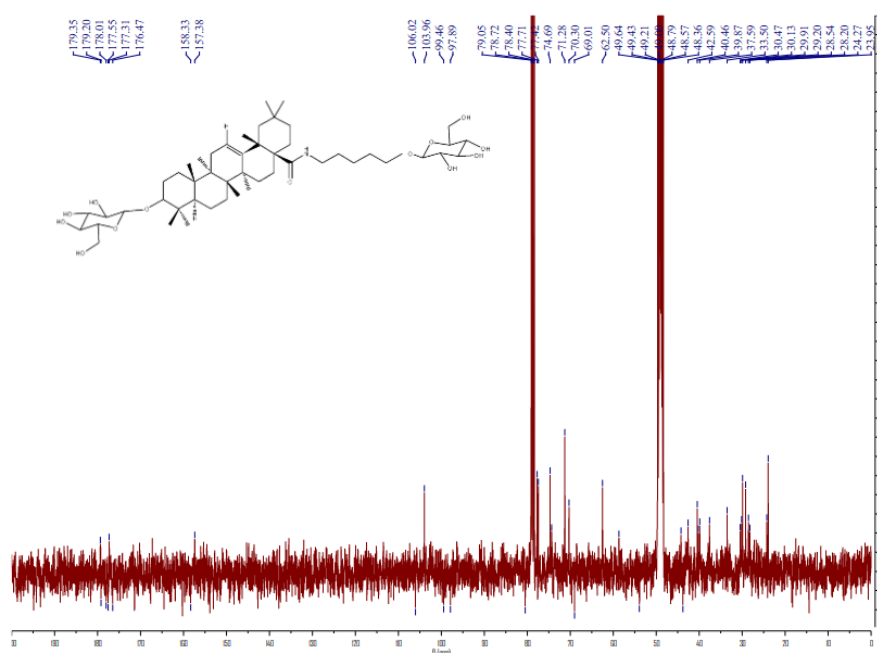Figure S47. <sup>13</sup>C NMR of L16

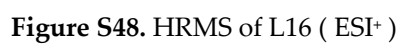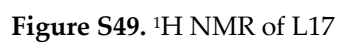



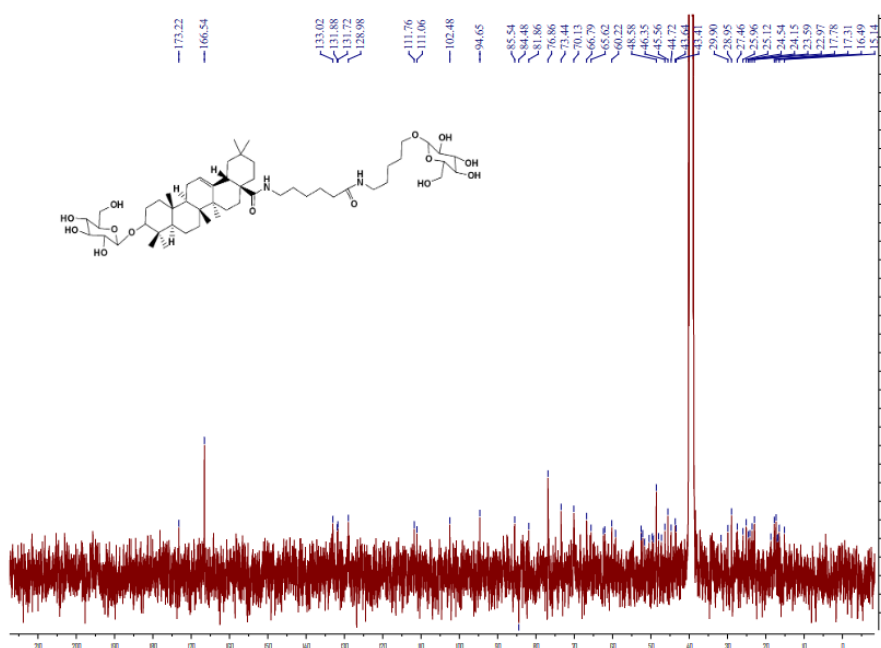Figure S50. <sup>13</sup>C NMR of L17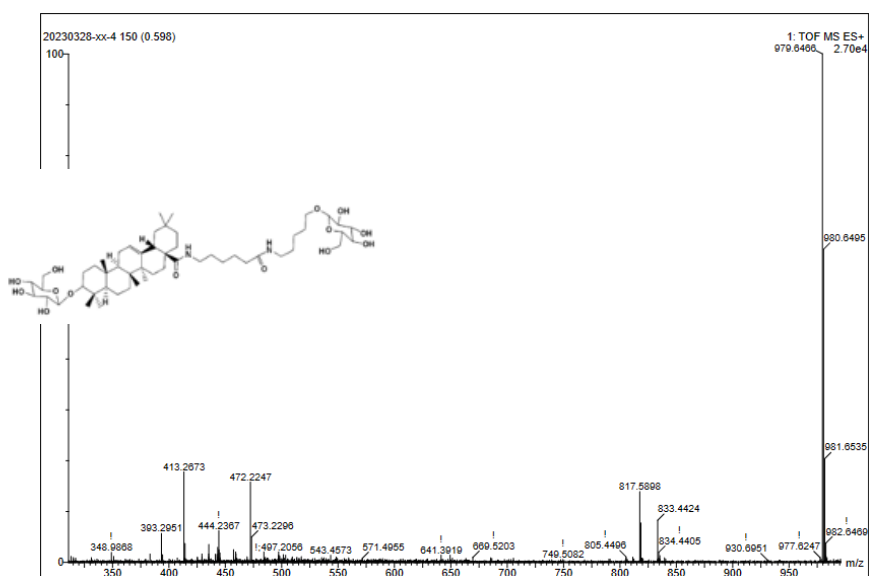Figure S51. HRMS of L17 (ESI<sup>+</sup>)

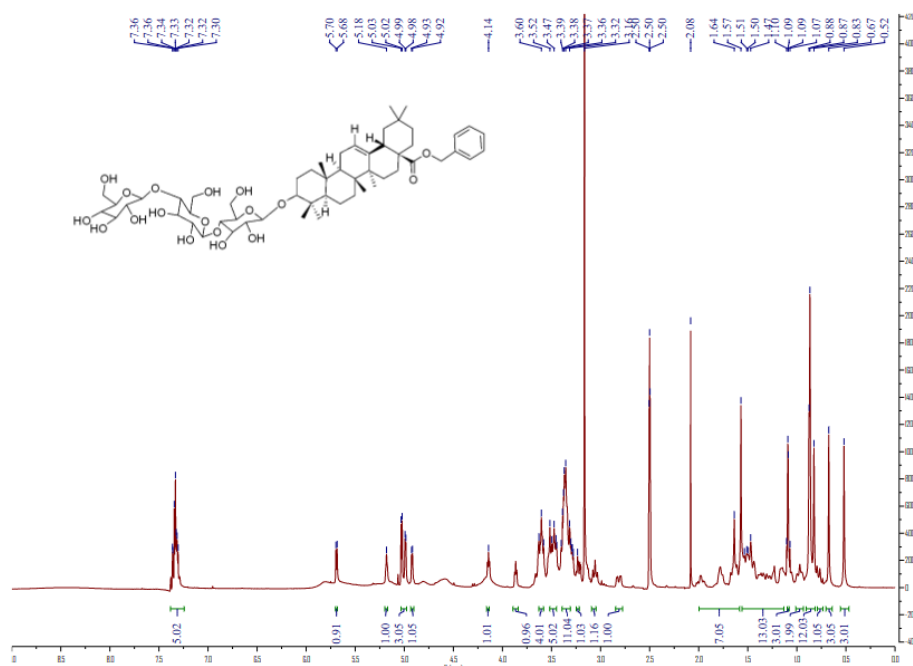Figure S52. <sup>1</sup>H NMR of L18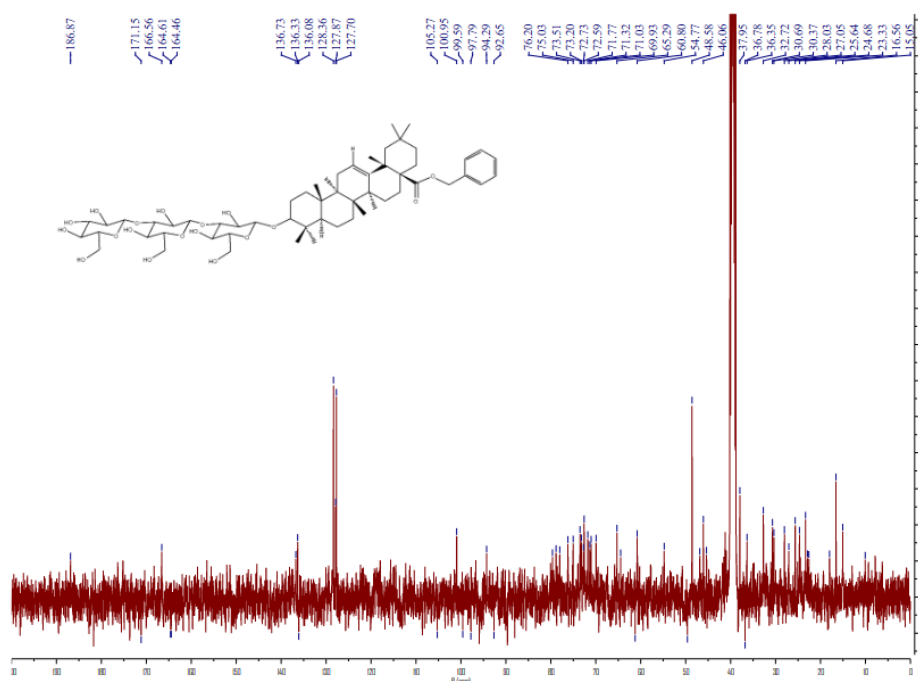Figure S53. <sup>13</sup>C NMR of L18

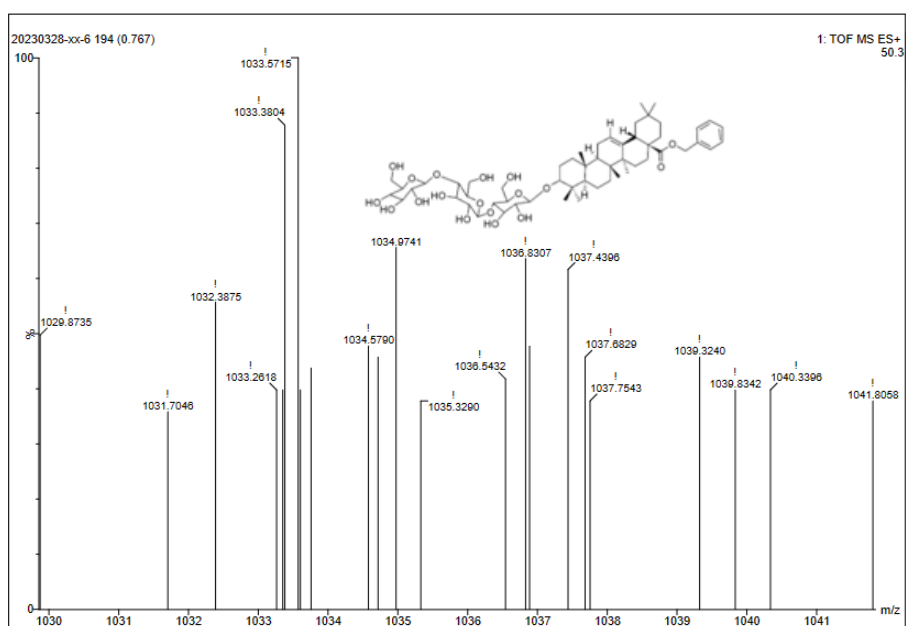Figure S54. HRMS of L18 (ESI<sup>+</sup>)
